# Supplementary material for: Comparison of 4 Screening Methods for Detecting Fluoropyrimidine Toxicity Risk: Identification of the Most Effective, Cost-Efficient Method to Save Lives
Source: PubMed Central journal article supplement — Dose Response. 2020 Sep 14;18(3):1559325820951367. doi: 10.1177/1559325820951367 (PMC7493257; doi:10.1177/1559325820951367), 2020-09-14
Supplement: Supplemental_material.pdf [file Supplemental_material.pdf]

## SUPPLEMENTARY INFORMATION

**Table 7:** Comparison of the 4 screening approaches to correctly predict grade 4 or higher FP toxicity.

| <b>Toxicity <math>\geq</math> Grade 4</b>                      | <b>Genotyping</b> | <b>Phenotyping<br/>Uracil <math>\geq</math> 16 ng/ml</b> | <b>Phenotyping<br/>UH<sub>2</sub>/U ratio</b> | <b>Multi-Parametric<br/>Method</b> |
|----------------------------------------------------------------|-------------------|----------------------------------------------------------|-----------------------------------------------|------------------------------------|
| N                                                              | 169               | 169                                                      | 169                                           | 169                                |
| Median result<br>(25 <sup>th</sup> Pctl_75 <sup>th</sup> Pctl) | -                 | 21.07<br>(12.70_32.23)                                   | 4.55<br>(3.14_5.71)                           | -                                  |
| Sensitivity n (%)                                              | 68 (40.2%)        | 108 (63.9%)                                              | 133 (78.7%)                                   | 161 (95.3%)                        |
| False negatives                                                | 101 (59.8%)       | 61 (36.1%)                                               | 36 (21.3%)                                    | 8 (4.7%)                           |

"-"= not applicable
